# Supplementary material for: Magnetosheath jet properties and evolution as determined by a global hybrid-Vlasov simulation
Source: Copernicus journal article supplement (doi:10.5194/angeo-36-1171-2018), 2018-09-07
Supplement: Supplementary file 1 [file angeo-36-1171-2018-supplement.zip]

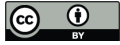

*Supplement of*

## **Magnetosheath jet properties and evolution as determined by a global hybrid-Vlasov simulation**

**Minna Palmroth et al.**

*Correspondence to:* Minna Palmroth ([minna.palmroth@helsinki.fi](mailto:minna.palmroth@helsinki.fi))

- [angeo-36-1171-2018-supplement-title-page.pdf](#)
- [S1.mp4](#)
- [S2.mp4](#)

The copyright of individual parts of the supplement might differ from the CC BY 4.0 License.
