# Supplementary material for: Magnetosheath jet properties and evolution as determined by a global hybrid-Vlasov simulation
Source: Copernicus journal article supplement (doi:10.5194/angeo-36-1171-2018), 2018-09-07
Supplement: Supplementary file 2 [file angeo-36-1171-2018-supplement.zip]

Archive with 3 entries (3 files):
- angeo-36-1171-2018-supplement-title-page.pdf
- S1.mp4
- S2.mp4
